# Supplementary material for: Nanosheets with High-Performance Electrochemical Oxygen Reduction Reaction Revived from Green Walnut Peel
Source: MDPI journal article supplement (doi:10.3390/molecules27010328), 2022-01-05
Supplement: s1 [file s1]

# Ultra-thin nanosheets with high-performance electrochemical oxygen reduction reaction derived from green walnut peel

Yifei Zhou<sup>1</sup>, Lei Yan<sup>1</sup> and Junhua Hou<sup>1,2,\*</sup>

1 School of Physics and Information Engineering, Shanxi Normal University, No.339 Taiyu Road, Xiaodian District, Taiyuan 030031, China; [219110014@sxnu.edu.cn](mailto:219110014@sxnu.edu.cn)(Y.F.Z); [220110010@sxnu.edu.cn](mailto:220110010@sxnu.edu.cn)(L.Y.)

2 Extreme Optical Collaborative Innovation Center, Shanxi University, No. 92, Wucheng Road, Xiaodian District, Taiyuan 030006, China

\* Correspondence: [jhhou@sxnu.edu.cn](mailto:jhhou@sxnu.edu.cn); Tel.: +86-13203574868

## 1. Experimental Section

### 1.1 Synthesis of biomass nanoparticles

The green walnut shells (GWS) peel is first to cut into 1×1 cm squares, rinsed with deionized water repeatedly, and dried in a constant temperature drying oven at 70°C for 48 hours to obtain dehydrated green walnut peels, and then crushed with a crusher at 32000r/min. A uniform 100 mesh green walnut skin powder was obtained in 10 minutes, named GWS precursor (GWS stands for Green walnut skin, the same below), then take a proper amount of GWS precursor and a proper amount of melamine (1:5) and mix it evenly, and transfer to the high-pressure stainless steel lined with tetrafluoroethylene. In the reactor (100 ml), use an oven to heat at 180°C for 12h, named GWS180M, then transfer the sample to a constant temperature oven, dry at 70°C, and then take GWS180MX and place it in a tube furnace under N<sub>2</sub> atmosphere. Carbonization is carried out at four given temperatures (700, 800, 900, and 1000°C). The heating rate is 5°C/min, and the heating is 4 hours. The N-doped carbon material of GWS180M-X (M=Melamine, X represents the carbonization temperature 700, 800, 900, and 1000°C) was collected at room temperature. Finally, a series of GWS materials were fully ground in an agate mortar, and soluble impurities were repeatedly washed with deionized water and absolute ethanol and dried at 60°C.

The GWS-X samples were characterized by the Raman, SEM and TEM measurements. Some of the material characterization and equipment

are the same as the previous reports.

## 1.2 Evaluation of the electrocatalytic activity toward ORR

To prepare the electrode for ORR measurements, some GWS-X nanoparticles were dispersed in the solution of 50 $\mu$ L Nafion solution, 250 $\mu$ L isopropanol, and 700  $\mu$ L deionized water were mixed in a 1.5 mL centrifuge tube and sonicated for 1 hour using a sonicator to form a catalyst suspension. Finally, take 10  $\mu$ L droplets of the catalyst suspension on the surface of the electrode and wait for it to dry naturally (the average catalyst loading is 0.25 mg cm<sup>-2</sup>).

The electrocatalytic activity was measured in a 0.1 M oxygen saturated KOH solution using an electrochemical workstation (CHI 760E, CH Instruments Inc., Shanghai, China) in a standard three electrode system. The three-electrode system was a catalyst-modified glass rotating disc electrode (GC-RDE) as the working electrode, with platinum wire and a 3M/L KCl solution The Ag/AgCl electrodes are the counter electrode and the reference electrode. All measured potentials are referred to as reversible hydrogen electrodes (RHE) in 0.1 M KOH by RHE calibration, as shown in the following equation:

$$E_{RHE} = E_{Ag/AgCl} + 0.9762V \quad (1)$$

Linear sweep voltammetry (LSV) was carried out at a scan rate of 1.0 mV s<sup>-1</sup> for the whole polarization curves.

**Table S1.** The content of C, N, and O elements and N configuration calculated of GWS800, GWS180M700, GWS180M800, GWS180M900, and GWS800M1000 from elemental analysis and XPS.

| Samples     | Elemental content (at. %) |       |       | N configuration (%) |            |             |            |
|-------------|---------------------------|-------|-------|---------------------|------------|-------------|------------|
|             | C 1s                      | N 1s  | O 1s  | pyridinic-N         | pyrrolic-N | graphitic-N | oxidized-N |
|             |                           |       |       |                     |            |             |            |
| GWS800      | 81                        | 0.87  | 14.23 | 24.1                | 4.1        | 20.5        | 51.2       |
| GWS180M700  | 73.91                     | 2.11  | 9.59  | 37.9                | 6.6        | 44.0        | 9.3        |
| GWS180M800  | 70.98                     | 10.46 | 16.73 | 48.5                | 30.6       | 19.0        | 1.9        |
| GWS180M900  | 76.46                     | 5     | 14.4  | 35.9                | 44.2       | 15.4        | 4.4        |
| GWS180M1000 | 79.18                     | 1.28  | 13.55 | 11.7                | 83.3       | 1.7         | 3.3        |
